# Supplementary material for: Highly dispersed ultrafine Ni particles embedded into MOF-74 arrays by partial carbonization for highly efficient hydrogen evolution
Source: Royal Society of Chemistry journal article supplement (doi:10.1039/d0ma00253d), 2020-01-01
Supplement: d0ma00253d1.pdf [file d0ma00253d1.pdf]

*Supporting Information for*

## Highly dispersed ultrafine Ni particles embedded into MOF-74 arrays by partial carbonization for highly efficient hydrogen evolution

Jing-Bo Tan, Jing-Qi Wu, Jia-Wei Zhao, Ling-Jie Xie, and Gao-Ren Li\*

*MOE Key Laboratory of Bioinorganic and Synthetic Chemistry, School of Chemistry, Sun Yat-Sen University, Guangzhou 510275, China.*

### Experimental

**Preparation of bulk Ni-MOF-74 electrodes.** Typically, 8.0 mg Ni-MOF-74, 10  $\mu$ l 5% nafion and 500  $\mu$ l ethanol was sonicated at least 30 min to form the ink. And then the ink was dropped into 1  $\times$  1 cm NF and dried by hot air. All Ni foam electrode substrates were etched in 3.0 M HCl solution for 30 min to remove the native nickel oxide on the surface and was washed by DI water several times prior to pasting.

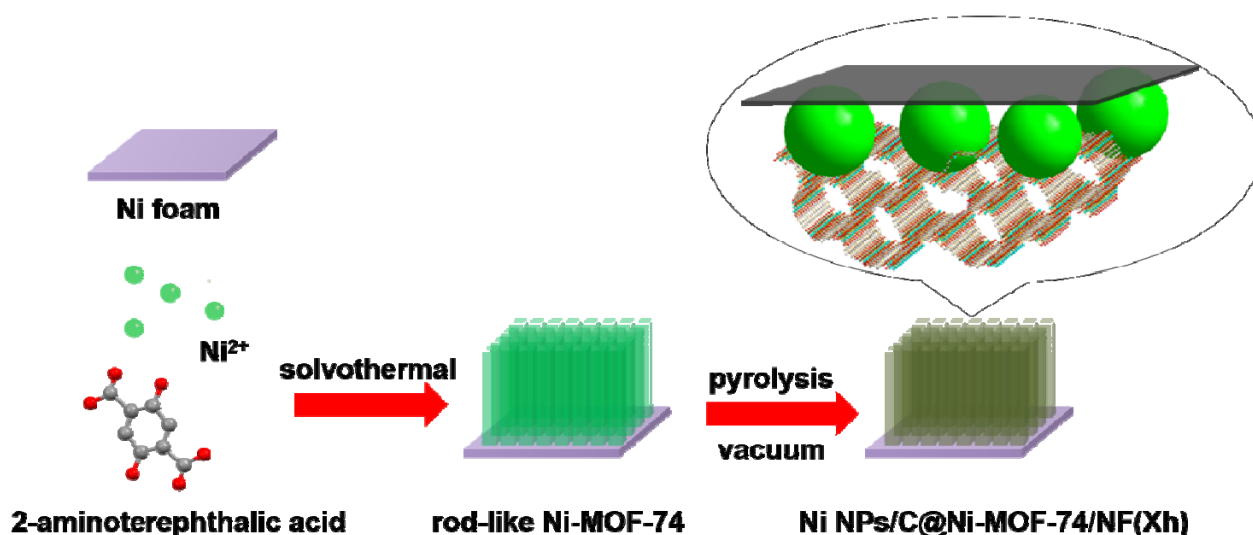

Scheme S1. The synthesis scheme of Ni NPs/C@Ni-MOF-74/NF.

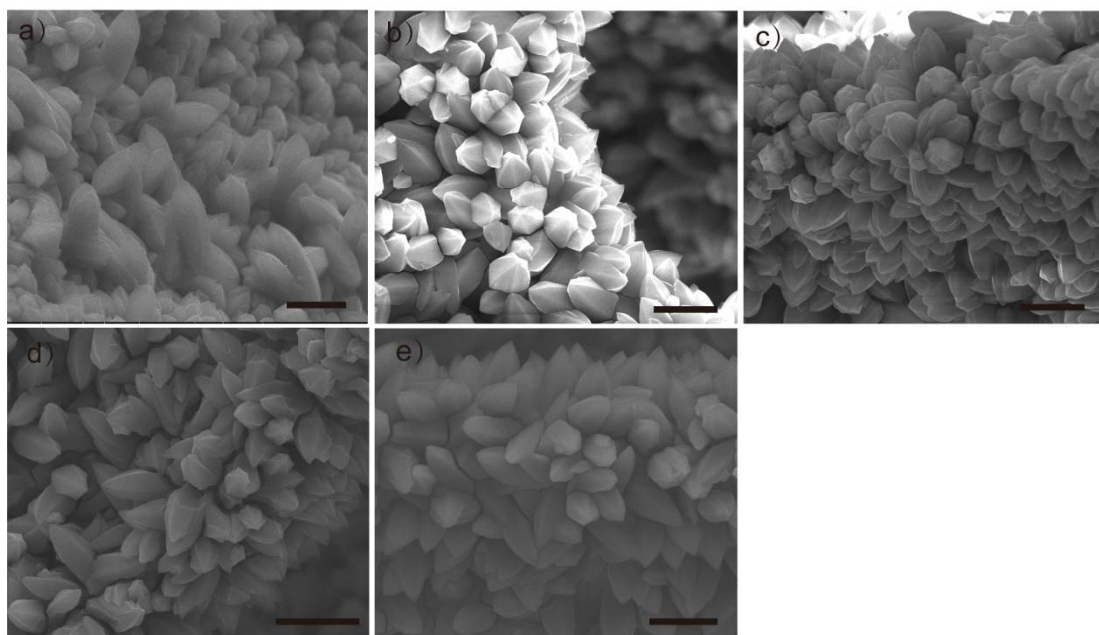

**Fig. S1** a) SEM image of Ni-MOF-74/NF; SEM images of b) Ni NPs/C@Ni-MOF-74(6 h), c) Ni NPs/C@Ni-MOF-74(12 h), d) Ni NPs/C@Ni-MOF-74(18 h), and e) Ni NPs/C@Ni-MOF-74(24 h) (black scale bar is 10  $\mu\text{m}$ ).

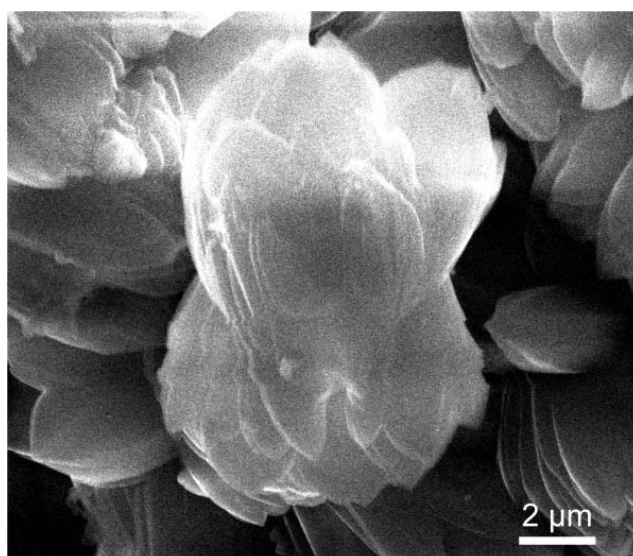

**Fig. S2** SEM image of Ni-MOF-74.

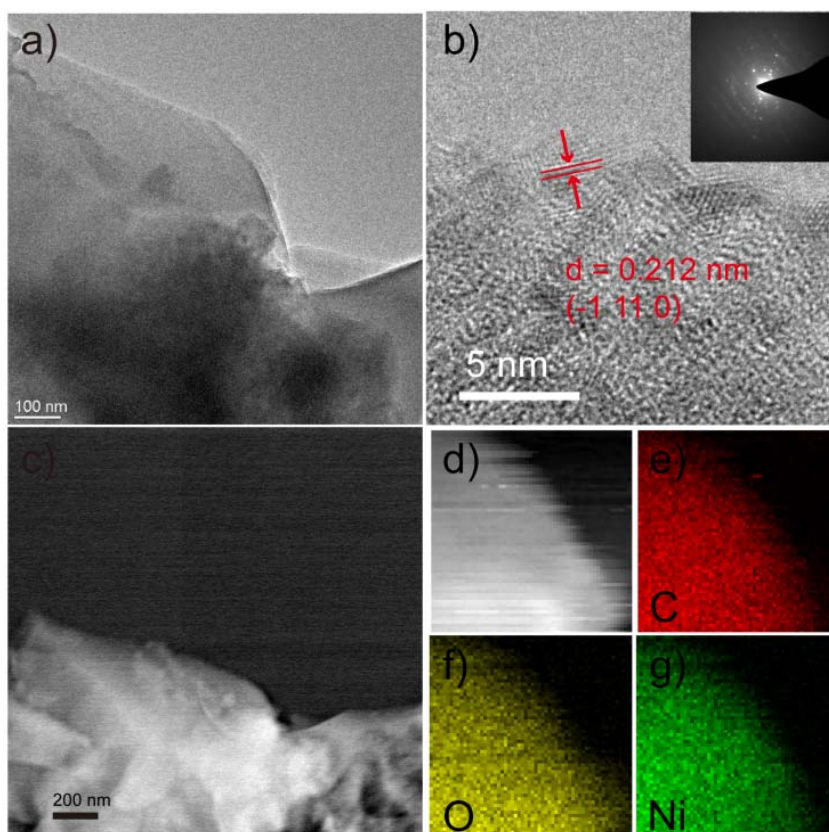

**Fig. S3** a) TEM image; b) HRTEM image with electron diffraction (inset); c) STEM image; d) HADDF-STEM image; e-g) elemental mappings of Ni-MOF-74.

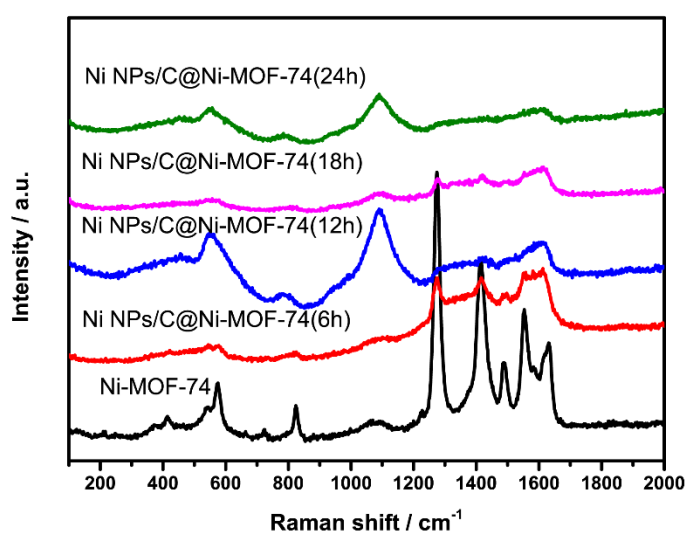

**Fig. S4** Raman spectra of Ni-MOF-74/NF, Ni NPs/C@Ni-MOF-74(6 h), Ni NPs/C@Ni-MOF-74(12 h), Ni NPs/C@Ni-MOF-74(18 h), and Ni NPs/C@Ni-MOF-74(24 h).

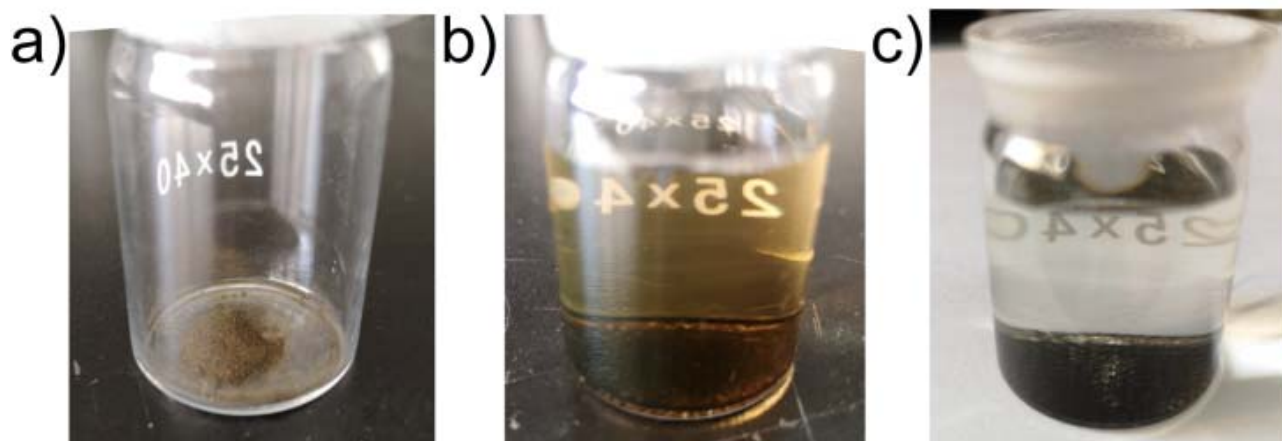

**Fig. S5** Optical images of a) initial Ni NPs/C@Ni-MOF-74(18 h), b) Ni NPs/C@Ni-MOF-74(18 h) treated with 0.1M HCl, and c) Ni NPs/C@Ni-MOF-74(18 h) rinsed with 0.1M HCl.

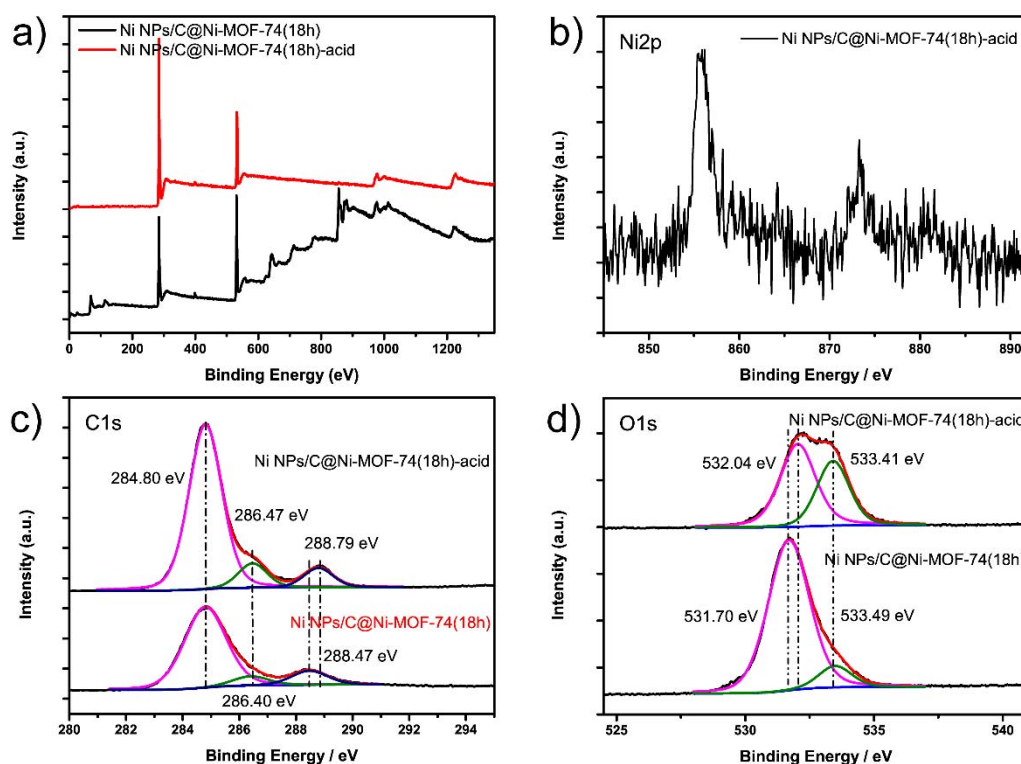

**Fig. S6** a) XPS survey spectra of Ni NPs/C@Ni-MOF-74(18 h) before and after HCl treatment; b) XPS spectrum of Ni 2p of Ni NPs/C@Ni-MOF-74(18 h) after HCl treatment; c) XPS spectra of C 1s and d) O 1s of Ni NPs/C@Ni-MOF-74(18 h) before and after HCl treatment.

In detail, the residue is carbon since the Ni NPs/C@Ni-MOF-74(18 h) frameworks are all collapsed after

acid treatment. With the comparison of both full XPS spectra, a big change occurs after acid treatment. In addition, the weak signals of Ni 2p core peaks are observed as shown in Figure S6b, implying that only few Ni<sup>2+</sup> ions are absorbed by the carbon residue. In addition, XPS spectra of C 1s and O 1s of Ni NPs/C@Ni-MOF-74(18h) after acid treatment also confirms the residue is carbon because they are different from those of the ligand (2-aminoterephthalic acid) inside the frameworks.

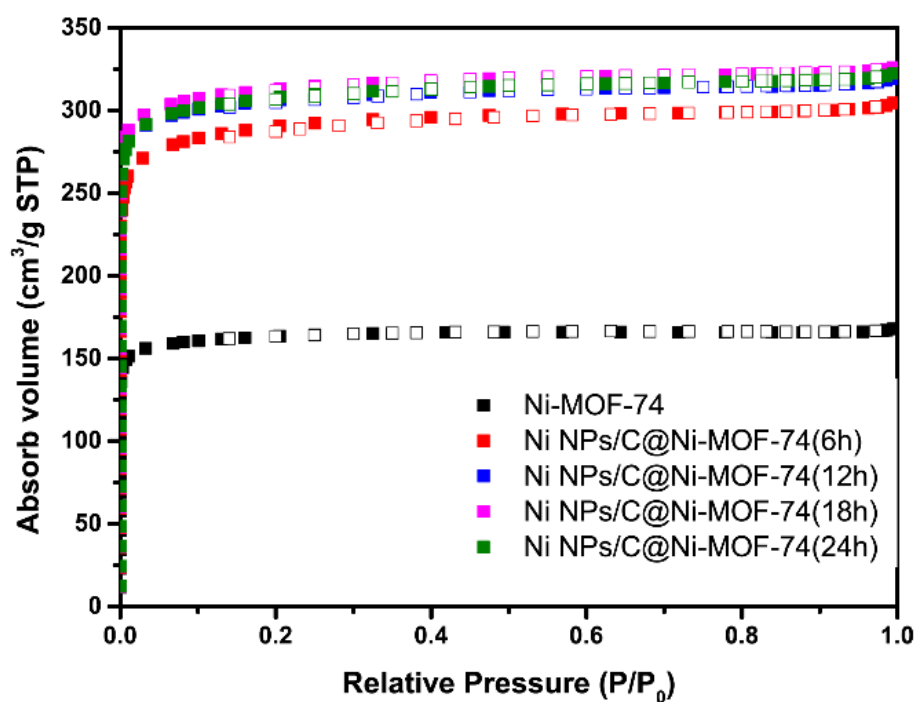

**Fig. S7** N<sub>2</sub> adsorption-desorption isotherms of Ni-MOF-74/NF, Ni NPs/C@Ni-MOF-74(6 h), Ni NPs/C@Ni-MOF-74(12 h), Ni NPs/C@Ni-MOF-74(18 h), and Ni NPs/C@Ni-MOF-74(24 h) at 77K.

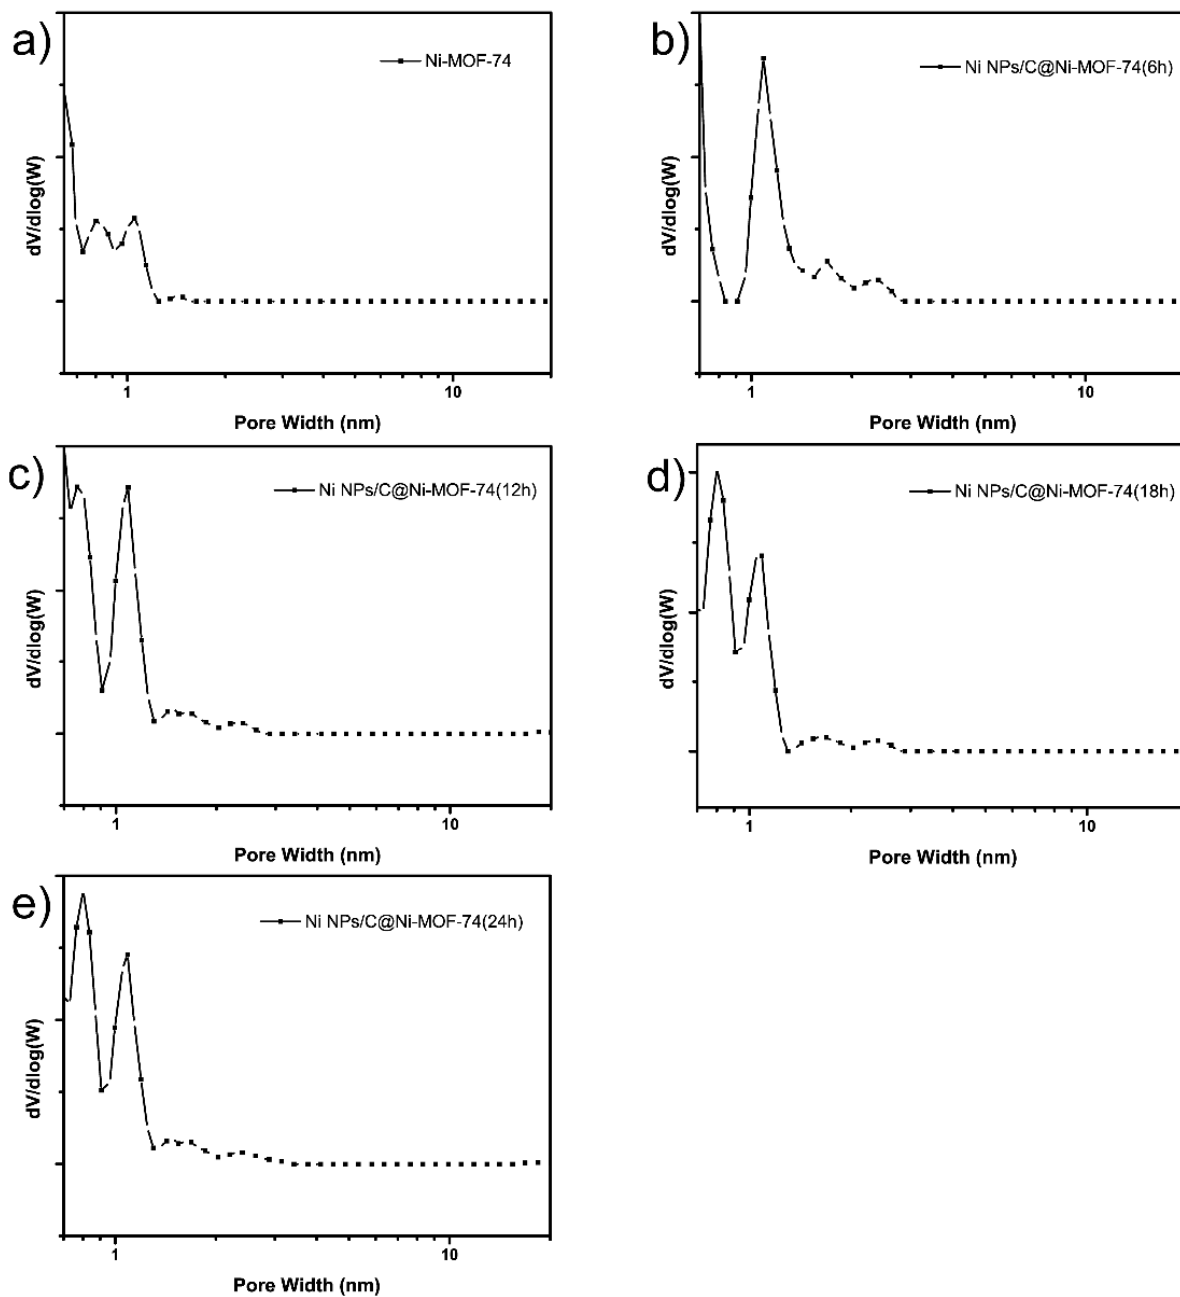

**Fig. S8** Pore size distribution plots of Ni-MOF-74/NF, Ni NPs/C@Ni-MOF-74(6 h), Ni NPs/C@Ni-MOF-74(12 h), Ni NPs/C@ Ni-MOF-74(18 h), and Ni NPs/C@Ni-MOF-74(24 h).



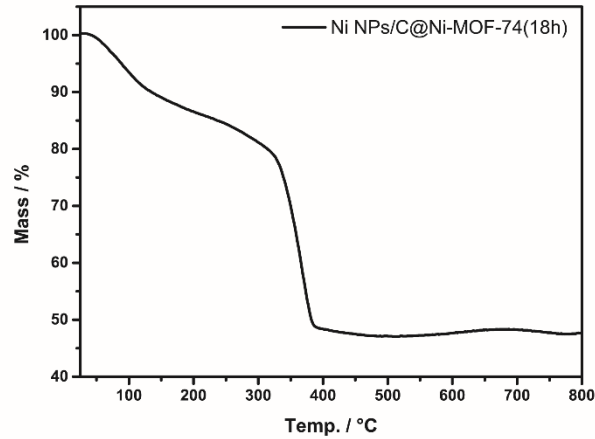

**Fig. S9** TGA curve of Ni NPs/C@Ni-MOF-74(18 h) under air atmosphere up to 800 °C.

As we know, the formula of Ni-MOF-74 was  $\text{Ni}_2(\text{C}_8\text{H}_6\text{O}_8)$ ,  $M_w = 347.51$ . The decompose chemical equation of the generated Ni NPs/C@Ni-MOF-74 is assumed that:

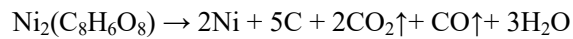

Given that  $m_{\text{total}} = 2.26 \text{ mg}$ ,  $m_{\text{residue}} = 1.09 \text{ mg}$

$$n_{\text{Ni-MOF-74}} = (m_{\text{total}} \times 0.001 - ((58.69 + 60.00) \div 74.69 \times m_{\text{residue}} \times 0.001)) / (347.51 - 2 \times (58.69 + 60.00)) = 4.72 \times 10^{-6} \text{ mol}$$

$$n_{\text{Ni}} = (m_{\text{residue}} \times 0.001 / 74.69) - (2 \times n_{\text{Ni-MOF-74}}) = 5.21 \times 10^{-6} \text{ mol}$$

Molar ratio of Ni : Ni-MOF-74  $\approx 1.1 : 1$

Mass ratio of Ni particles in Ni NPs/C@Ni-MOF-74(18 h)  $\omega = n_{\text{Ni}} \times 58.69 \div (m_{\text{total}} \times 0.001) = 13.55 \%$

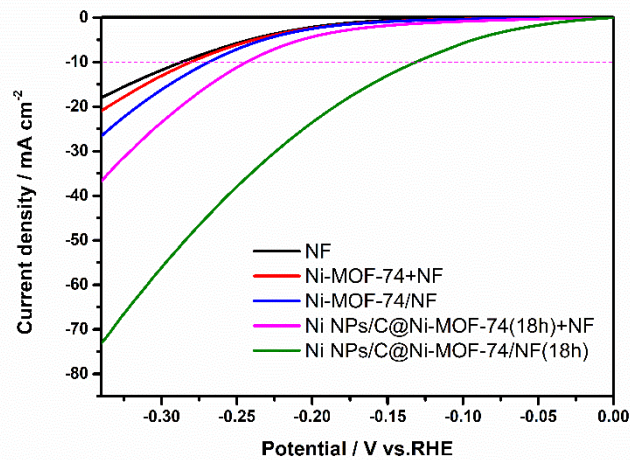

**Fig. S10** LSVs of Ni NPs/C@Ni-MOF-74/NF(18 h), Ni-MOF-74/NF and their counterparts.

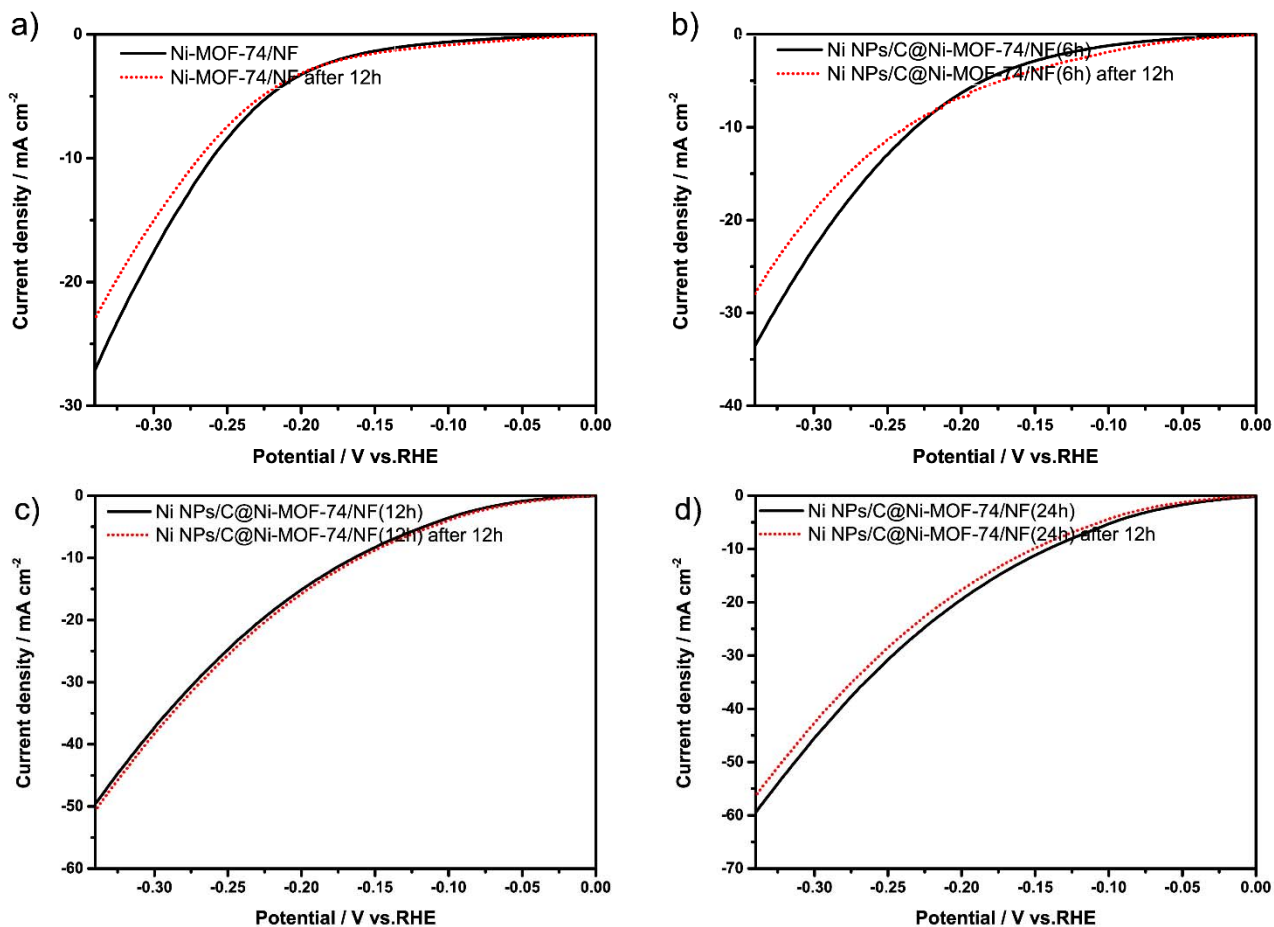

Fig. S11 LSVs of all as-prepared catalysts before and after 12 h electrolysis.

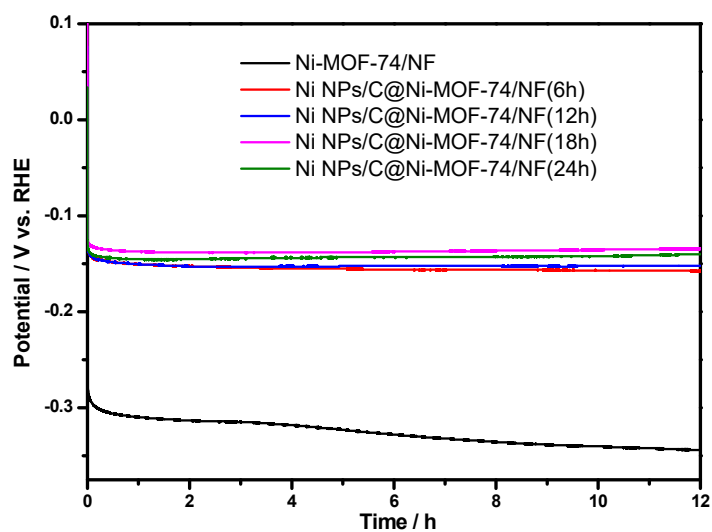

Fig. S12 Chronopotentiometric curves of various catalysts at current density of  $10 \text{ mA cm}^{-2}$ .



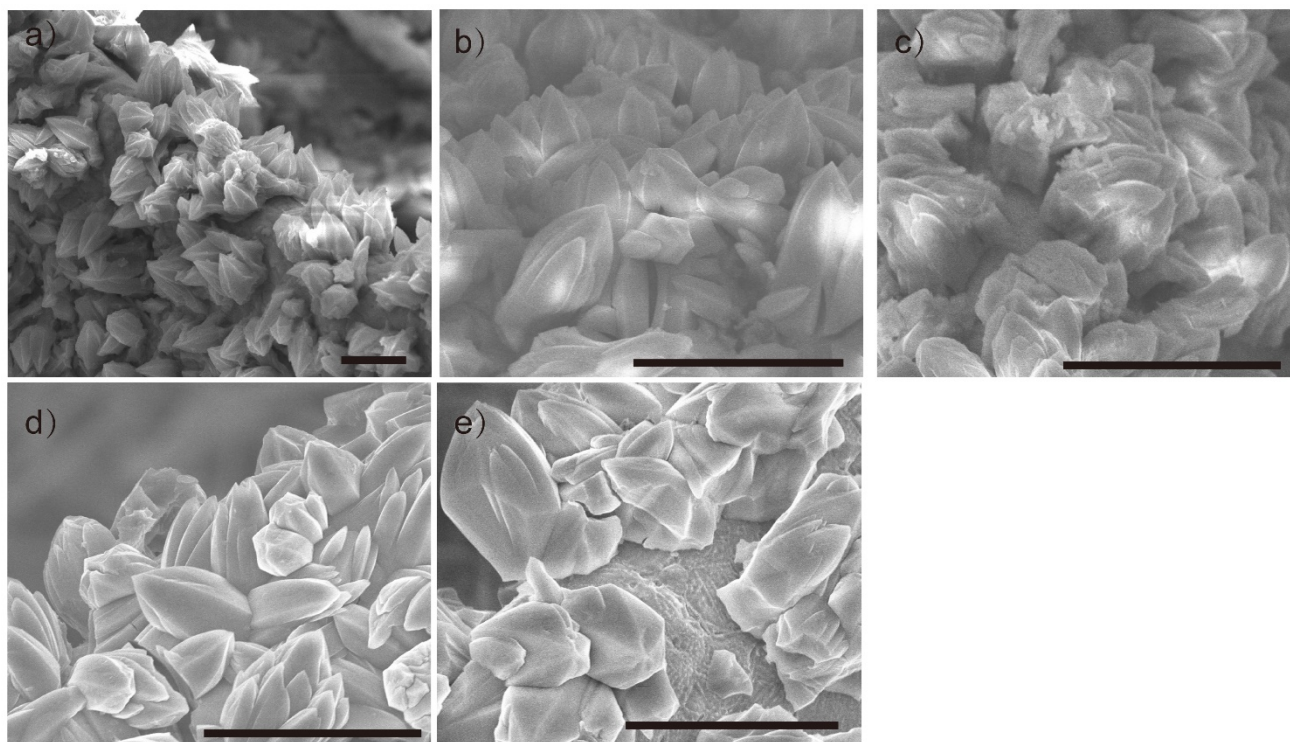

**Fig. S13** SEM images of a) Ni-MOF-74/NF, b) Ni NPs/C@Ni-MOF-74(6 h), c) Ni NPs/C@Ni-MOF-74(12 h), d) Ni NPs/C@Ni-MOF-74(18 h), and e) Ni NPs/C@Ni-MOF-74(24 h) after durability tests (black scale bar is 10  $\mu\text{m}$ ).

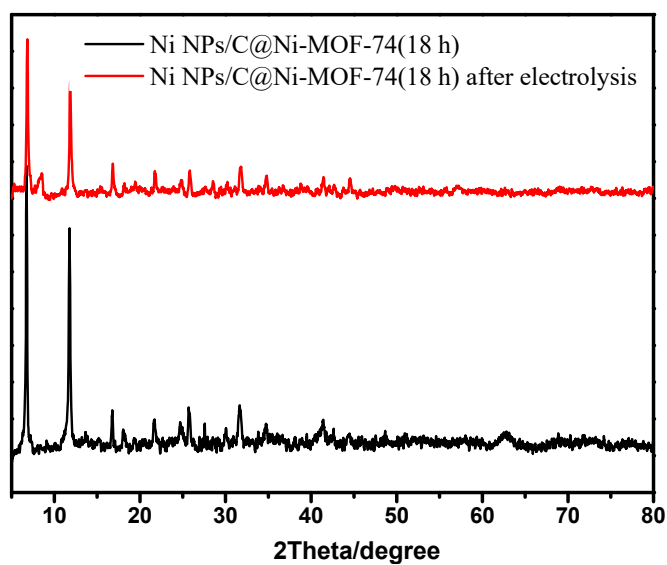

**Fig. S14** PXR D patterns of Ni NPs/C@Ni-MOF-74(18 h) before and after durability test.

**Table S1.** Comparisons of HER activities over MOF-based electrocatalysts in alkaline solution.

| HER catalyst                                           | Electrolyte                          | Overpotential <sup>a)</sup> / mV | Tafel slope / mV dec <sup>-1</sup> | Stability tests <sup>b)</sup>  | Ref.      |
|--------------------------------------------------------|--------------------------------------|----------------------------------|------------------------------------|--------------------------------|-----------|
| Ni-MOF-74 arrays /NF                                   | 1.0 M KOH                            | 269                              | 133                                | 12 h gradually decay           | This work |
| Ni NPs/C@Ni-MOF-74/NF(6 h)                             | 1.0 M KOH                            | 183                              | 117                                | 12 h slightly decay            | This work |
| Ni NPs/C@Ni-MOF-74/NF(12 h)                            | 1.0 M KOH                            | 165                              | 108                                | 12 h                           | This work |
| Ni NPs/C@Ni-MOF-74/NF(18 h)                            | 1.0 M KOH                            | 131                              | 104                                | 48 h                           | This work |
| Ni NPs/C@Ni-MOF-74/NF(24 h)                            | 1.0 M KOH                            | 143                              | 106                                | 12 h                           | This work |
| NiFe-MOF array/NF                                      | 0.1 M KOH                            | 134                              | N/A                                | 2000 s                         | 1         |
| NFN-MOF/NF                                             | 1.0 M KOH                            | 87                               | 35                                 | 30 h 8.0% decay                | 2         |
| MFN-MOFs/NF                                            | 1.0 M KOH                            | 79                               | 30                                 | N/A                            | 3         |
| Ni <sub>2</sub> P Ps-3                                 | 1.0 M KOH                            | 158                              | 73                                 | 20 h                           | 4         |
| Co <sub>3</sub> S <sub>4</sub> /EC-MOF                 | 1.0 M KOH                            | 84                               | 82                                 | 24 h                           | 5         |
| Co-NC/CNT-800                                          | 1.0 M KOH                            | 203                              | 125                                | 1000 cycles and 30000 s        | 6         |
| Co/Co <sub>9</sub> S <sub>8</sub> @ SNGS-1000          | 0.1 M KOH                            | 350 mV at 20 mA cm <sup>-2</sup> | 96                                 | 1000 cycles                    | 7         |
| Ni@graphene                                            | 1.0 M KOH                            | 240                              | 120                                | 10 h                           | 8         |
| NCF-MOF                                                | 0.1 M KOH                            | 110                              | 114                                | 20000 s                        | 9         |
| Fe-Ni@NC-CNTs                                          | 1.0 M KOH                            | 202                              | 114                                | 40000 s                        | 10        |
| HUST-200                                               | acidic aqueous medium                | 131                              | 51                                 | 9 h                            | 11        |
| AB&CTGU9(3: 4)                                         | 0.5 M H <sub>2</sub> SO <sub>4</sub> | 128                              | 87                                 | 21 h                           | 12        |
| UU-100(Co)                                             | pH = 4 0.2 M acetate buffer          | N/A                              | 250                                | 5 h                            | 13        |
| Ni-NiO/C HPPAs                                         | 1.0 M KOH                            | 49                               | 74                                 | 30 h 3.7% decay                | 14        |
| NiFeSe@NiSe O@CC                                       | 1.0 M KOH                            | 40                               | 49                                 | 50 h 3.5%decay                 | 15        |
| NiCoFeP/C                                              | 1.0 M KOH                            | 149                              | 108                                | 20 h                           | 16        |
| Ni-ZIF/Ni-B@NF                                         | 1.0 M KOH                            | 67                               | 108                                | 64 h                           | 17        |
| Ni@NC (NH <sub>3</sub> -plasma MOF-74-Ni)              | 1.0 M KOH                            | 61                               | 89                                 | 18 h slight decay              | 18        |
| Ni <sub>3</sub> (Ni <sub>3</sub> -HAHATN) <sub>2</sub> | 0.1 M KOH                            | 115                              | 45                                 | 10 h 27% decay and 1000 cycles | 19        |

a) Overpotential is measured at 10 mA cm<sup>-2</sup>; b) the duration of the chronoamperometric (or chronopotentiometric) results and the number of CV cycles are summarized in this table (the current density decrease after CV cycles and chronoamperometric curve decrease denote “decay”).

**Table S2.** EIS results of Ni-MOF-74/NF, Ni NPs/C@Ni-MOF-74(6 h), Ni NPs/C@Ni-MOF-74(12 h), Ni NPs/C@Ni-MOF-74 (18 h), and Ni NPs/C@Ni-MOF-74(24 h).

| Electrode                   | $R_s$ ( $\Omega$ ) | $R_{ct}$ ( $\Omega$ ) |
|-----------------------------|--------------------|-----------------------|
| Ni-MOF-74/NF                | 2.67               | 6.98                  |
| Ni NPs/C@Ni-MOF-74/NF(6 h)  | 2.47               | 5.97                  |
| Ni NPs/C@Ni-MOF-74/NF(12 h) | 2.40               | 4.87                  |
| Ni NPs/C@Ni-MOF-74/NF(18 h) | 2.05               | 3.69                  |
| Ni NPs/C@Ni-MOF-74/NF(24 h) | 1.84               | 4.30                  |

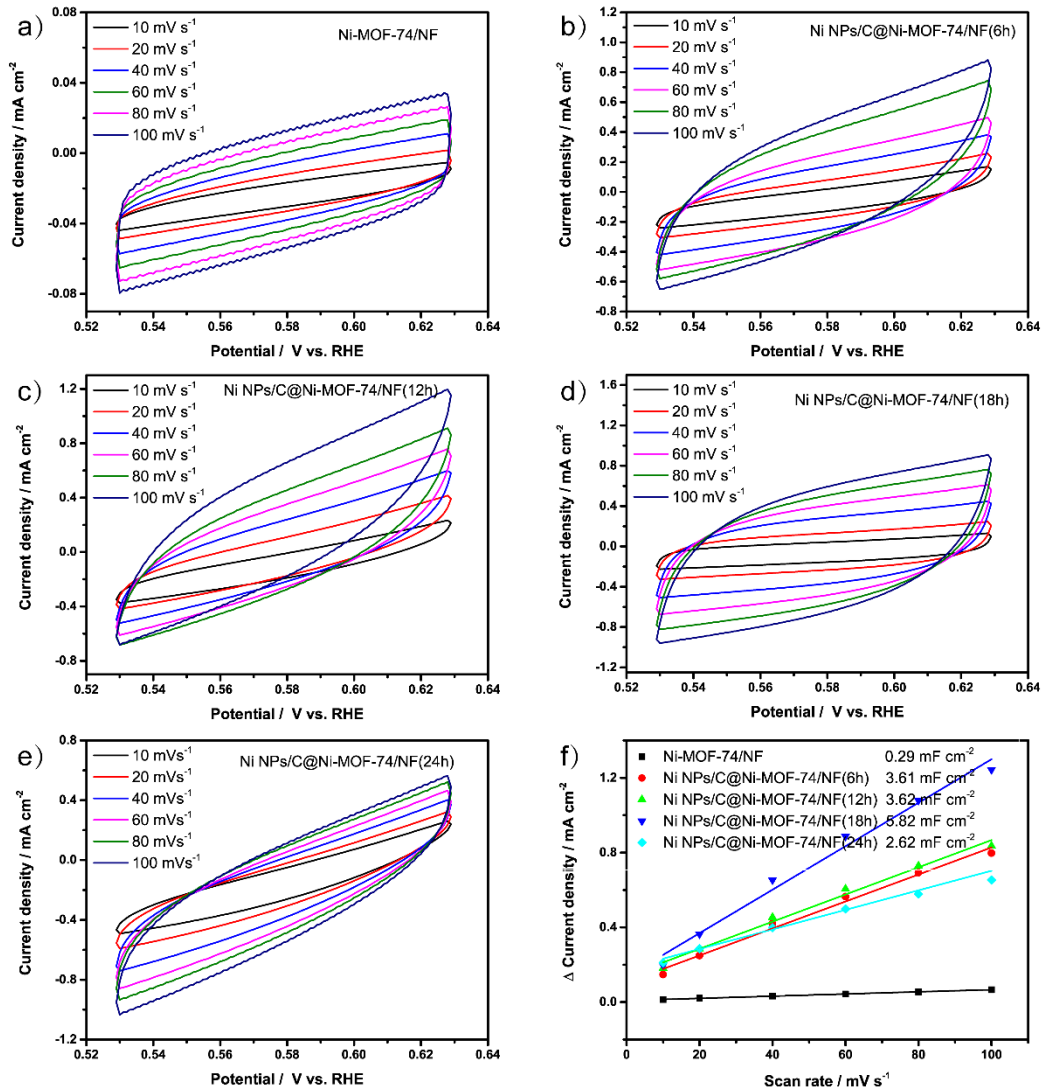

**Fig. 15** a-e) CVs of all samples with different treatment time in 1.0 M KOH solution at varying scan rates, f) The plots of the capacitive current density  $\Delta j$  as a function of scan rates.

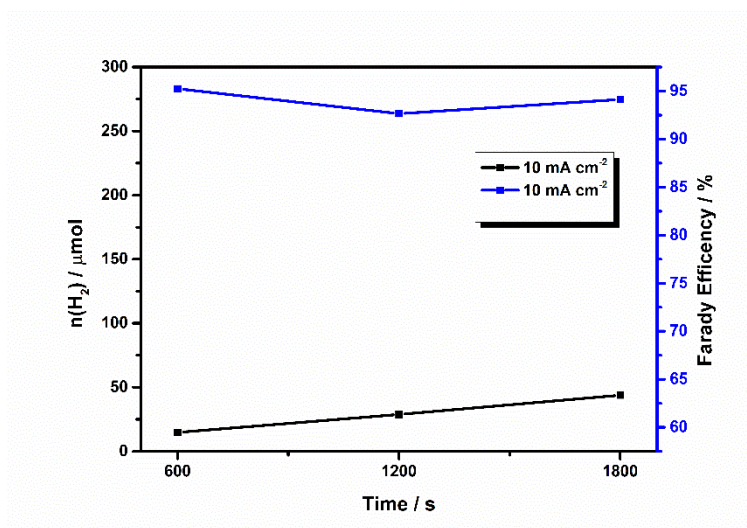

**Fig. S16** The experimental H<sub>2</sub> product amount of Ni NPs/C@Ni-MOF-74/NF(18 h) at 10 mA cm<sup>-2</sup> and the corresponding Faraday efficiency.

The Faraday efficiency of Ni NPs/C@Ni-MOF-74/NF(18 h) was measured at the current density of 10 mA cm<sup>-2</sup>. The operation measurement of the Faraday Efficiency shows as follows: A piece of Ni NPs/C@Ni-MOF-74/NF(18 h) (surface area = 0.5 cm<sup>2</sup>) was immersed in the electrolyte as the working electrode. The head space volume of the electrolytic cell and the volume of solution were measured to be 35.0 and 21.0 mL, respectively. Before measurement, the cell was purged by Ar gas for about 30 min to eliminate the air background. The hydrogen concentrations were measured using gas chromatography (GC, Agilent 7820A) equipped with Molecular sieve 5 Å capillary column and thermal conductivity detector. The Faraday Efficiency at 10 mA cm<sup>-2</sup> with time increasing was kept around 93%.

## References

1. J. Duan, S. Chen and C. Zhao, *Nat. Commun.*, 2017, **8**, 15341.
2. D. S. Raja, X. F. Chuah and S. Y. Lu, *Adv. Energy Mater.*, 2018, **8**, 1801065.
3. D. Senthil Raja, H.-W. Lin and S.-Y. Lu, *Nano Energy*, 2019, **57**, 1-13.
4. L. Yan, P. Dai, Y. Wang, X. Gu, L. Li, L. Cao and X. Zhao, *ACS Appl. Mater. Interfaces*, 2017, **9**, 11642-11650.
5. T. Liu, P. Li, N. Yao, T. Kong, G. Cheng, S. Chen and W. Luo, *Adv. Mater.*, 2019, **31**, 1806672.
6. F. L. Yang, P. P. Zhao, X. Hua, W. Luo, G. Z. Cheng, W. Xing and S. L. Chen, *J. Mater. Chem. A*, 2016, **4**, 16057.
7. X. Zhang, S. W. Liu, Y. P. Zang, R. R. Liu, G. Q. Liu, G. Z. Wang, Y. X. Zhang, H. M. Zhang and H. J. Zhao,

- Nano Energy*, 2016, **30**, 93-102.
8. L. H. Ai, T. Tian and J. Jiang, *ACS Sustainable Chem. Eng.*, 2017, **5**, 4771-4777.
  9. W. Ahn, M. G. Park, D. U. Lee, M. H. Seo, G. P. Jiang, Z. P. Cano, F. M. Hassan and Z. W. Chen, *Adv. Funct. Mater.*, 2018, **28**, 1802129.
  10. X. Zhao, P. Pachfule, S. Li, J. R. J. Simke, J. Schmidt and A. Thomas, *Angew. Chem., Int. Ed.*, 2018, **57**, 8921-8926.
  11. L. Zhang, S. Li, C. J. Gomez-Garcia, H. Ma, C. Zhang, H. Pang and B. Li, *ACS Appl. Mater. Interfaces*, 2018, **10**, 31498-31504.
  12. W. Zhou, Y. P. Wu, X. Wang, J. W. Tian, D. D. Huang, J. Zhao, Y. Q. Lan and D. S. Li, *CrystEngComm*, 2018, **20**, 4804-4809.
  13. S. Roy, Z. Huang, A. Bhunia, A. Castner, A. K. Gupta, X. Zou and S. Ott, *J. Am. Chem. Soc.*, 2019, **141**, 15942-15950.
  14. W. Zhou, X. F. Lu, J. J. Chen, T. Zhou, P. Q. Liao, M. Wu and G. R. Li, *ACS Appl. Mater. Interfaces*, 2018, **10**, 38906-38914.
  15. C. Yilmaz, C. F. Tan, Y. F. Lim and C. W. Ho, *Adv. Energy Mater.*, 2019, **9**, 1802983.
  16. X. Wei, Y. Zhang, H. He, L. Peng, S. Xiao, S. Yao and P. Xiao, *Chem. Commun.*, 2019, **55**, 10896-10899.
  17. H. Xu, B. Fei, G. Cai, Y. Ha, J. Liu, H. Jia, J. Zhang, M. Liu and R. Wu, *Adv. Energy Mater.*, 2020, **10**, 1902714.
  18. Y. Guo, X. Gao, C. Zhang, Y. Wu, X. Chang, T. Wang, X. Zheng, A. Du, B. Wang, J. Zheng, K. Ostrikov and X. Li, *J. Mater. Chem. A*, 2019, **7**, 8129-8135.
  19. H. Huang, Y. Zhao, Y. Bai, F. Li, Y. Zhang and Y. Chen, *Adv. Sci.*, 2020, 2000012.
